# Supplementary material
Source: Springer Nature journal article supplement (https://www.springermedizin.de/resource/supplementary/12913_2011_2022_MOESM5_ESM.pdf/9529620)

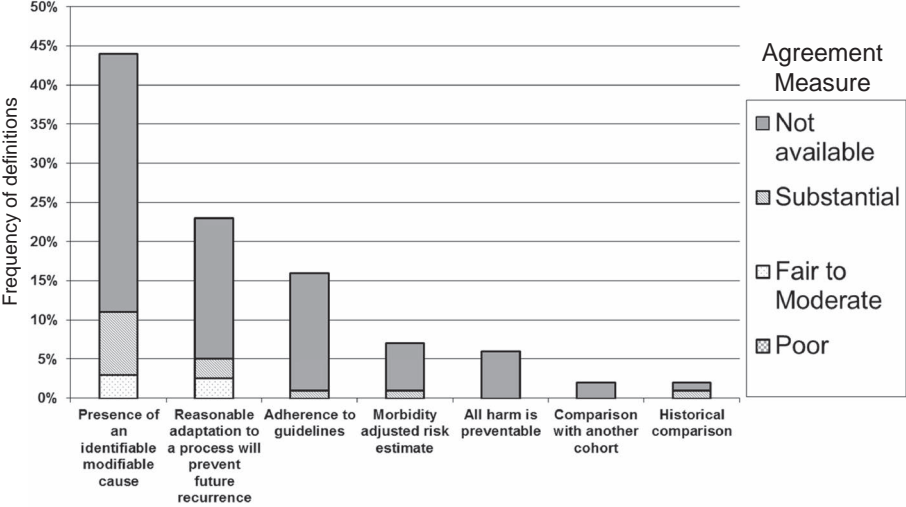

Supplement: MOESM5 [file 9529620]
